# Supplementary material
Source: PubMed Central journal article supplement (PMC2980581)
Supplement: NIHMS238864-supplement-01.pdf [file NIHMS238864-supplement-01.pdf]

## Supplementary material

for

### A modified fluorescent intercalator displacement assay for RNA ligand discovery

Papa Nii Asare-Okai and Christine S. Chow\*

Department of Chemistry, Wayne State University, Detroit, MI 48202

#### Figures

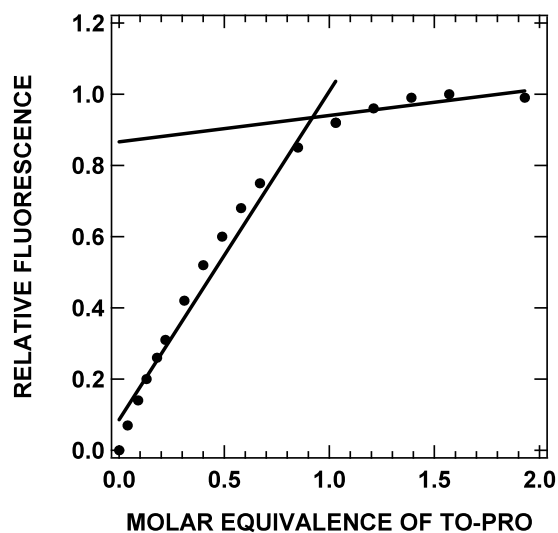

**Figure S1:** Fluorescence titration data of the A-site RNA (3 μM) with TO-PRO is shown (buffer conditions were 100 mM KCl, 20 mM Tris, pH 7).

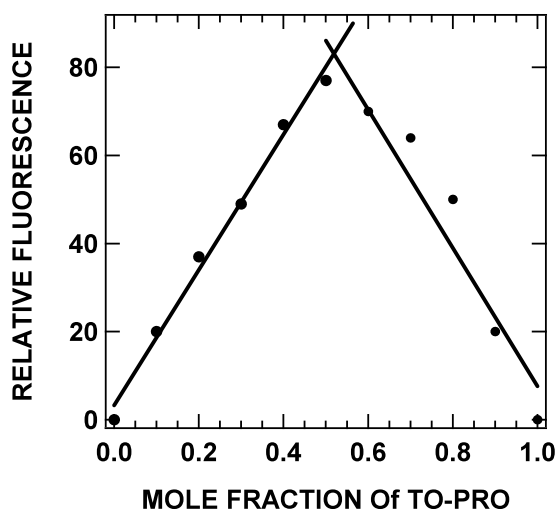

**Figure S2:** A Job plot of TO-PRO binding to the A-site RNA (3  $\mu\text{M}$ ) is given (buffer conditions were 100 mM KCl, 20 mM Tris, pH 7).

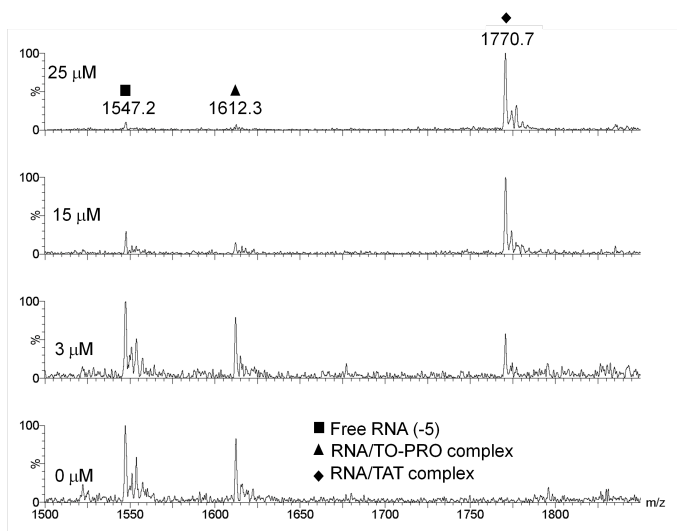

**Figure S3:** ESI-MS spectra showing a titration of Tat peptide into equimolar concentrations of TAR RNA and TO-PRO complex (1  $\mu\text{M}$ ). Buffer conditions are 150 mM ammonium acetate, pH 7.

## Tables

**Table S1:** Quantification of the ESI-MS peak areas of the TO-PRO:A-site RNA complex after titration with 0–15  $\mu\text{M}$  of paromomycin.

| [paromomycin]<br>$\mu\text{M}$ | fraction bound<br>(TO-PRO) <sup>a</sup> |
|--------------------------------|-----------------------------------------|
| 0                              | 0.29                                    |
| 1                              | 0.25                                    |
| 3                              | 0.20                                    |
| 6                              | 0.19                                    |
| 10                             | 0.13                                    |
| 15                             | 0.04                                    |

<sup>a</sup>The fraction bound of TO-PRO was calculated by dividing the peak area corresponding to A-site RNA/TO-PRO complex by the peak area corresponding to total RNA (peak area of total RNA is equal to the summation of the peak area for free RNA, RNA/TO-PRO complex, and RNA/paromomycin complex).

**Table S2:** Quantification of the ESI-MS peak areas of TO-PRO:A-site RNA complex after titration with 0–100  $\mu\text{M}$  of chloramphenicol.

| [chloramphenicol]<br>$\mu\text{M}$ | fraction bound<br>(TO-PRO) <sup>a</sup> |
|------------------------------------|-----------------------------------------|
| 0                                  | 0.23                                    |
| 5                                  | 0.26                                    |
| 40                                 | 0.29                                    |
| 100                                | 0.26                                    |

<sup>a</sup>The fraction bound of TO-PRO was calculated by dividing the peak area corresponding to A-site RNA/TO-PRO complex by the peak area corresponding to total RNA (peak area of total RNA is equal to the summation of the peak area for free RNA, RNA/TO-PRO complex, and RNA/chloramphenicol complex).

**Table S3:** FID assay of Tat peptide utilizing pre-bound equimolar concentrations of TAR RNA and TO-PRO (1  $\mu\text{M}$  each). Buffer conditions were 150 mM ammonium acetate, pH 7. The data shown is an average of three separate experiments.

| dye ( $\mu\text{M}$ ) | TAR RNA ( $\mu\text{M}$ ) | Tat ( $\mu\text{M}$ ) | relative fluorescence (%) |
|-----------------------|---------------------------|-----------------------|---------------------------|
| 1                     | 0                         | 0                     | 0.3                       |
| 1                     | 1                         | 0                     | 100                       |
| 1                     | 1                         | 2                     | 86                        |
| 1                     | 1                         | 10                    | 49                        |
| 1                     | 1                         | 19                    | 35                        |
| 1                     | 1                         | 31                    | 23                        |

**Table S4:** Quantification of the ESI-MS peak areas of TO-PRO:TAR RNA complex after titration with 0–25  $\mu\text{M}$  Tat peptide.

| [Tat], $\mu\text{M}$ | fraction bound (TO-PRO) <sup>a</sup> |
|----------------------|--------------------------------------|
| 0                    | 0.42                                 |
| 3                    | 0.35                                 |
| 15                   | 0.13                                 |
| 25                   | 0.05                                 |

<sup>a</sup>The fraction bound of TO-PRO was calculated by dividing the peak area corresponding to TAR RNA/TO-PRO complex by the peak area corresponding to total RNA (peak area of total RNA is equal to the summation of the peak area for free RNA, RNA/TO-PRO complex, and RNA/Tat complex).

**Table S5:** Comparison of the FID results and dissociation constants for DHR23 and paromomycin binding to H69 and A-site RNA.

|            | DHR23            |                                      | paromomycin      |                                      |
|------------|------------------|--------------------------------------|------------------|--------------------------------------|
|            | fluorescence (%) | $K_d$ ( $\mu\text{M}$ ) <sup>a</sup> | fluorescence (%) | $K_d$ ( $\mu\text{M}$ ) <sup>a</sup> |
| A-site RNA | 54               | 19                                   | 14               | 1.3                                  |
| H69        | 83               | 43                                   | 36               | 21                                   |

<sup>a</sup>Dissociation constants were obtained from ESI-MS experiments as described previously [25] and in the Materials and Methods section.
